# Supplementary material for: Acyclovir and Transmission of HIV-1 from Persons Infected with HIV-1 and HSV-2
Source: Atypon-hosted journal article supplement (doi:10.1056/nejmoa0904849), 2010-01-21
Supplement: nejm_celum_427sa1.pdf [file nejm_celum_427sa1.pdf]

## Supplementary Appendix

This appendix has been provided by the authors to give readers additional information about their work.

Supplement to: Celum C, Wald A, Lingappa JR, et al. Acyclovir and transmission of HIV-1 from persons infected with HIV-1 and HSV-2. *N Engl J Med* 2010;362:427-39. DOI: 10.1056/NEJMoa0904849.

## Web Appendix for Partners in Prevention HSV/HIV Transmission Study

### Laboratory procedures

Dual rapid HIV-1 antibody tests were performed at the clinic and confirmed with HIV-1 EIA. HIV-1 serostatus at enrollment visits for all participants and at follow-up visits for HIV-1 seroconverters was evaluated using Western blot (Genetics Systems™ HIV-1, Bio-Rad laboratories, Hercules, California) at the University of Washington at the end of the study. HSV-2 serostatus for eligibility for HIV-1 infected partners was determined by HerpeSelect-2 EIA (Focus Technologies, Cypress CA), using an index value cut-off of 3.4 to improve test specificity.<sup>1-3</sup> HSV-2 serostatus for all participants was confirmed with HSV Western blots using enrollment sera at the University of Washington.<sup>4</sup> Couples in which the HIV-1 infected partner did not have serologically-confirmed HIV-1 and HSV-2 infection at enrollment were excluded from all analyses.

CD4 quantification for HIV-1 infected participants was performed at screening and 6-month intervals using FACSCount or FACS Calibur Instrumentation (BD Biosciences, San Jose, USA). Plasma HIV-1 RNA was quantified in acid citrate dextrose (ACD) samples collected at the enrollment and month 3, 6, 12, and study exit visits using the 96-test COBAS AmpliPrep/COBAS TaqMan HIV-1 RNA assay, version 1.0, (Roche Diagnostics, Indianapolis, IN) at the University of Washington with a limit of detection of 240 copies/mL.

STI testing using samples collected at the enrollment visit included syphilis testing by rapid plasma reagin (RPR) at site laboratories (with MHA-TP confirmatory testing where available) and batch testing of endocervical swab (women) and urine (men) samples for *Chlamydia trachomatis*, *Neisseria gonorrhoeae*, and *Trichomonas vaginalis* by nucleic acid amplification assays at the University of Washington (Gen-Probe, San Diego, CA).<sup>5</sup> Swabs of genital ulcers were tested for HSV DNA at the University of Washington;<sup>6, 7</sup> samples with  $\geq 150$  copies of HSV DNA/mL were considered positive.

### Determination of HIV-1 transmission linkage among seroconverting couples

To differentiate valid study endpoints from seroconversions not attributable to transmissions within the study partnership, sequencing of HIV-1 strains from participants in all seroconverting pairs was performed (Campbell et al, manuscript in preparation). In summary, viral RNA was extracted from the blood plasma from

both the HIV-1 infected participants and their partners who seroconverted to HIV-1 during follow-up. cDNA was synthesized and a 514 base pair (bp) region of the *env* gene (C2-V3-C3 region) and a 1007 bp region of the *gag* gene (encoding the p17/p24 region) amplified by nested PCR. All partner pair viral sequences were first evaluated by consensus sequencing. Subsequently, viral sequences of 43 partner pairs not initially linked by consensus sequence were evaluated using cloned single molecule templates. Finally, single molecule templates without cloning (pyrosequencing) were used to evaluate 11 putative transmitting partners for rare variants linked to the transmitted virus. Laboratory technicians were blinded to study participants' identification numbers and randomization arm. To minimize risk of specimen mix-up and contamination, specimens from HIV-1 infected partners and seroconverting partners were processed by different technicians, with physical and temporal separation of laboratory work on partners' specimens.

Viral subtypes were determined using REGA 2.0 (<http://dbpartners.stanford.edu/RegaSubtyping>) or the NCBI subtyping tool (<http://www.ncbi.nlm.nih.gov/projects/genotyping/formpage.cgi>). Separate alignments were created for subtypes A, C, and D for *env* and *gag* sequences, and maximum likelihood phylogenetic trees and pairwise distances were determined with DIVER (<http://indra.mullins.microbiol.washington.edu/cgi-bin/DIVER/diver.cgi>) using a generalized time reversible model of evolution.

In order to ascertain the linkage status of sequences from HIV-1 infected participants and their seroconverting partners, we determined linkage of each couple's sequences based on the phylogeny (yes/no) and the distribution of genetic distances in epidemiologically linked and unlinked sequence pairs from the literature. We included the most closely related sequences from the Los Alamos database<sup>8</sup> to our sequences for the first 59 pairs, and  $\geq 10$  local control sequences from each community from which the transmitting pairs were derived. We developed a Bayesian algorithm to include an estimate of the probability of linkage from pairwise genetic distance data. Using the distributions of genetic distances from the reference datasets in known transmission pairs and in epidemiologically unlinked individuals, we determined the conditional probabilities that each pair was either linked or unlinked. In this manner, we used our knowledge about the probability of linkage between sequence pairs with a given distance to derive a posterior probability of linkage between a pair of sequences in our cohort based on the genetic distance data generated in our laboratory.

An adjudication committee consisting of independent experts who were HIV-1 virologists evaluated the data from each seroconverter pair. The adjudicators had not participated in the design of the protocol and

remained blinded to the treatment assignments of participants. A final adjudication meeting took place prior to study unblinding, in which the adjudicators conducted a comprehensive review of the dataset and made final linkage assignments by concurrence. An illustrative phylogenetic tree and linkage information for a linked and unlinked transmission is shown in Figure 1.

**Figure 1: Illustrative figure of linked and unlinked transmission pairs**

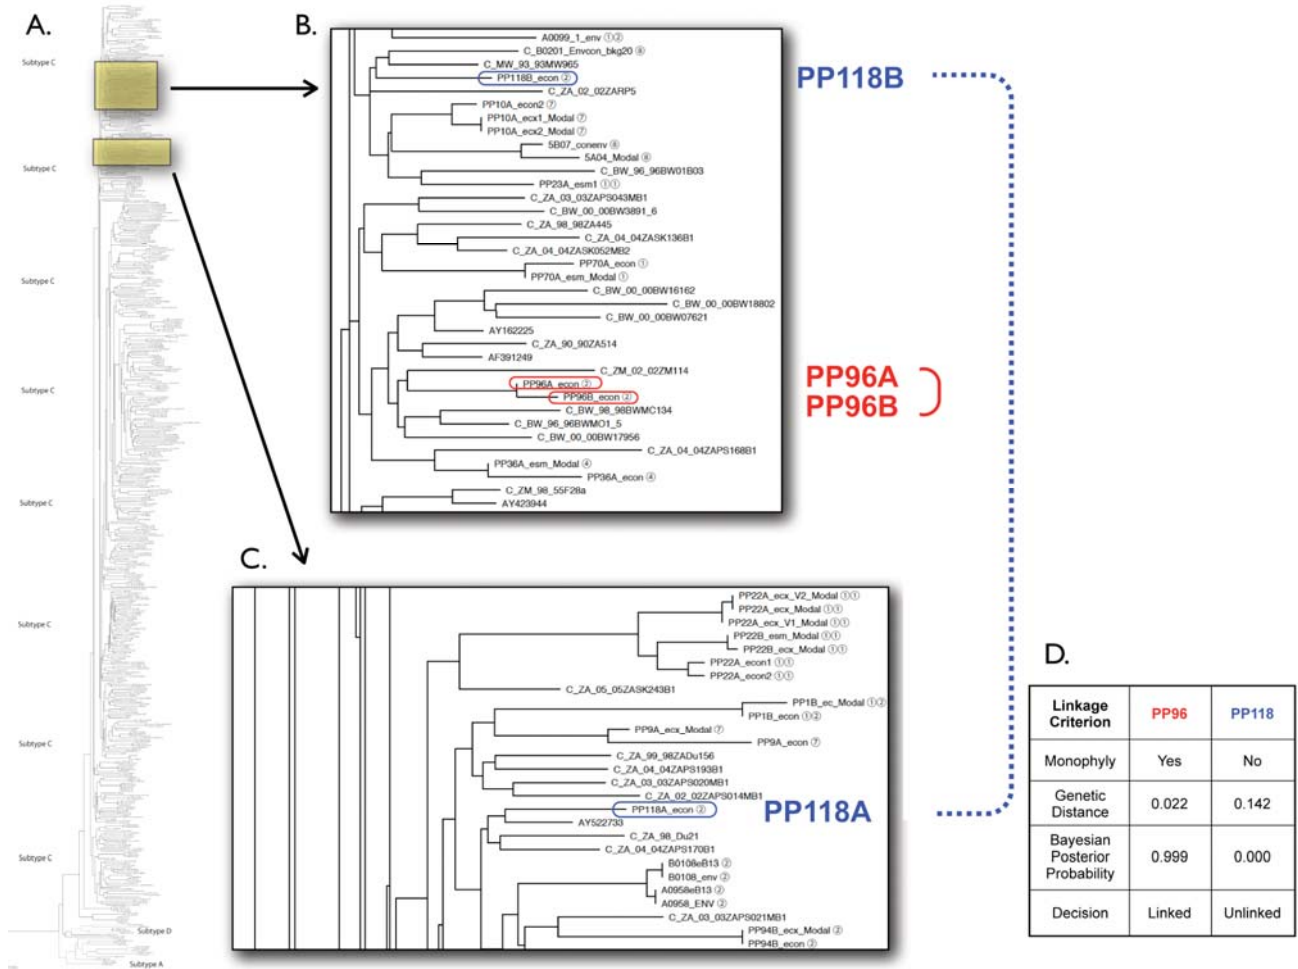

**Legend for Figure 1:** Determination of HIV-1 sequence linkage. HIV-1 sequences (C2-V3-C3 region of envelope) for trial participants and epidemiologically unlinked individuals are shown in the phylogenetic tree (A). Sections C of the tree are magnified (B and C) to highlight sequences from partner pair (PP) 96 whose sequences were determined to be 'linked' and PP118 whose sequences were determined to be 'unlinked'. Linked sequences from PP96 are circled in red and the two unlinked sequences from each partner in PP118 are circled in blue. Table D shows the criteria used for linkage determination: monophyly (i.e. originating from the same terminal node on the tree), genetic distance (proportion), and Bayesian posterior probability (proportion) (web Appendix).

## Retention of study participants by treatment arm and visit

Follow-up of the HIV-infected and uninfected partners by treatment group and study visit is summarized in Table 1. Of those eligible for 24 months of follow-up, 84% and 92% of HIV-1 negative and HIV-1 positive partners, respectively, remained in the study for 24 months

**Table 1: Retention by treatment arm and study visit**

|                  | Acyclovir       |                 | Placebo         |                 |
|------------------|-----------------|-----------------|-----------------|-----------------|
|                  | HIV+            | HIV-            | HIV+            | HIV-            |
| <b>3 months</b>  | 1626/1680 (97%) | 1618/1681 (96%) | 1616/1672 (97%) | 1593/1675 (95%) |
| <b>6 months</b>  | 1610/1678 (96%) | 1568/1671 (94%) | 1588/1664 (95%) | 1541/1658 (93%) |
| <b>9 months</b>  | 1555/1653 (94%) | 1525/1658 (92%) | 1538/1642 (94%) | 1496/1643 (91%) |
| <b>12 months</b> | 1446/1535 (94%) | 1439/1597 (90%) | 1409/1520 (93%) | 1393/1571 (89%) |
| <b>15 months</b> | 1253/1354 (92%) | 1221/1369 (89%) | 1220/1317 (93%) | 1178/1348 (87%) |
| <b>18 months</b> | 1030/1124 (92%) | 1049/1211 (87%) | 1011/1100 (92%) | 1027/1185 (87%) |
| <b>24 months</b> | 621/684 (91%)   | 618/736 (84%)   | 636/684 (93%)   | 617/733 (84%)   |

## Kaplan-Meier curve for Intent-to-Treat Analysis

Analysis of time to HIV-1 transmission among the 131 post-randomization transmissions, after excluding the one incorrect study drug dispensation, regardless of linkage by viral sequencing, is depicted in the Kaplan-Meier curve (Figure 2).

**Figure 2: Kaplan-Meier curve for Intent-To-Treat analysis**

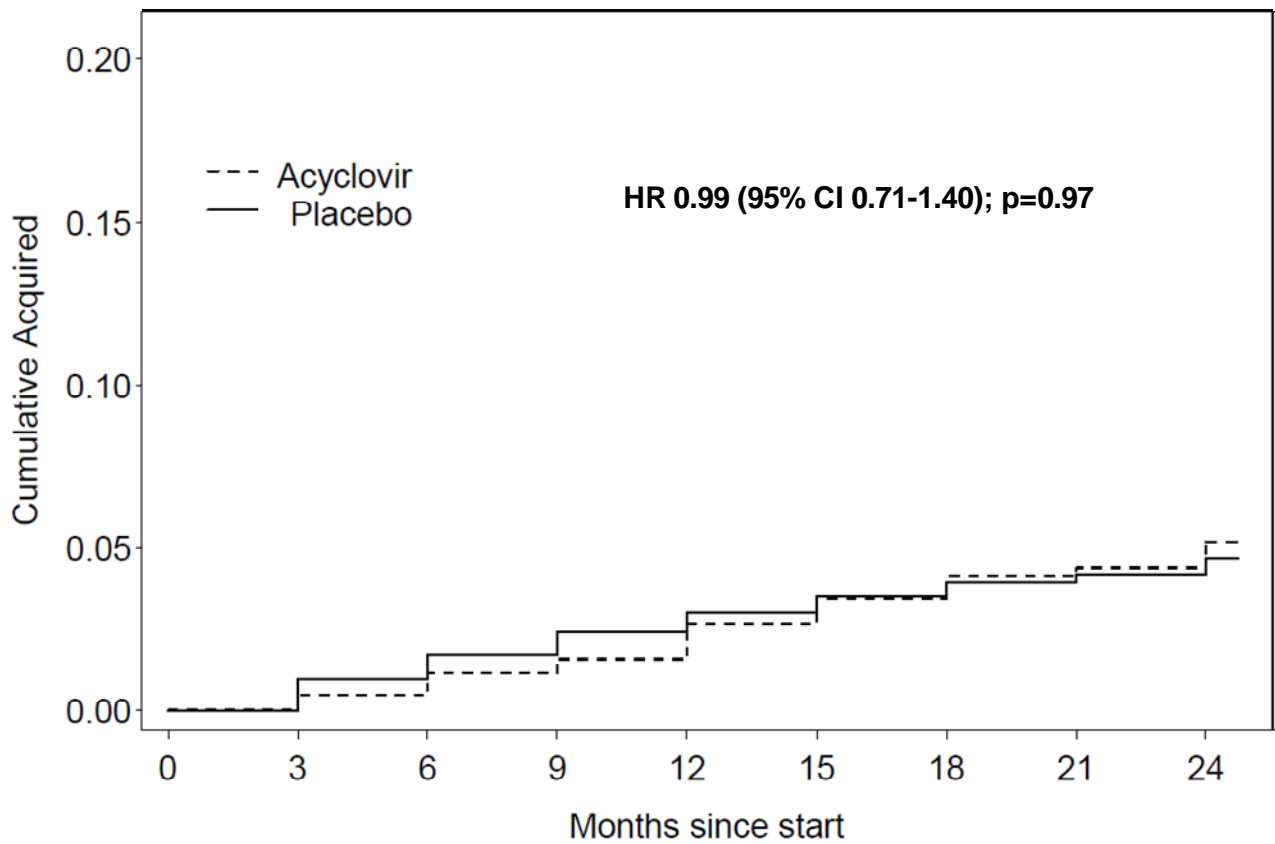

| No. at risk | 0    | 3    | 6    | 9    | 12   | 15   | 18   | 21  | 24  |
|-------------|------|------|------|------|------|------|------|-----|-----|
| Placebo     | 1657 | 1657 | 1622 | 1580 | 1480 | 1259 | 1073 | 814 | 618 |
| Acyclovir   | 1645 | 1645 | 1600 | 1551 | 1440 | 1225 | 1053 | 811 | 617 |

**Legend for Figure 2:** Dotted line represents cumulative probability of genetically-linked HIV-1 transmission for the acyclovir arm, solid line for the placebo arm

Serious Adverse Events

Given the extensive worldwide experience with acyclovir suppressive therapy in the past two decades, only serious adverse events (defined as new onset seizures, hospitalizations, and deaths) were reported. As shown in Table 2 below, SAEs was balanced by study arm. Only one SAE was possibly related to study drug, which was an intentional overdose by a participant who had been randomized to placebo with hospitalization for nausea and vomiting for 24 hours in a participant who had been randomized to placebo.

**Table 2: Incidence of serious adverse events, overall and by study arm**

|                                                                                   | <b>Total</b> | <b>Acyclovir</b> | <b>Placebo</b> |
|-----------------------------------------------------------------------------------|--------------|------------------|----------------|
| Injury                                                                            | 43           | 27               | 16             |
| Pneumonia and other respiratory illness                                           | 40           | 16               | 24             |
| Malaria                                                                           | 54           | 27               | 27             |
| Tuberculosis                                                                      | 7            | 4                | 3              |
| Gastrointestinal infections and other disorders                                   | 29           | 14               | 15             |
| Gynecologic conditions (Pregnancy complications, reproductive system, and breast) | 53           | 31               | 22             |
| Other infections                                                                  | 17           | 6                | 11             |
| Psychiatric                                                                       | 10           | 2                | 8              |
| Other                                                                             | 51           | 21               | 30             |
| Death                                                                             | 77           | 35               | 42             |
| <b>Total</b>                                                                      | <b>381</b>   | <b>183</b>       | <b>198</b>     |

Acyclovir content of study product under field conditions

We performed testing of acyclovir content in study product using an independent certified pharmacologic laboratory (ASI Inc, Durham, NC). The analytical testing was performed to GMP standards on over 20 lots of active acyclovir and placebo tablets returned from the study sites (thus, after storage at field conditions for 12-24 months). The blinded testing confirmed that acyclovir tablets contained 90-100% of indicated label strength.

Acyclovir levels to assess adherence to study drug:

Serum samples from HIV-1 infected study participants on acyclovir or placebo (N=183 and N=10, respectively) were analyzed for acyclovir by liquid chromatography tandem mass-spectrometry (NMS Labs, Willow Grove, PA); the limit of acyclovir quantitation was 20ng/ml. Specimens for testing were randomly selected with representation of sites that obtained time of last dose of study drug, collected at the final study visit from individuals reporting having taken their last study drug dose either  $\leq 12$  hours (N=114 for ACV arm and N=7 for placebo) or 12-24 hours (N=69 for ACV arm and N=3 for placebo) prior to their study visit.

Of those who reported taking a dose of study drug within the 12 hours prior to blood sampling, 82% (93/114) had detectable acyclovir, compared to 49% (34/69) of those whose most recent dose was  $>12$  hours

prior. The median amount of acyclovir detected correlated with time of last dose (data not shown). None of 10 randomly selected participants on the placebo arm had detectable acyclovir.

## **Partners in Prevention HSV/HIV Transmission Study Team:**

**Coordinating Center** (University of Washington, Seattle, USA): Connie Celum (study principal investigator), Anna Wald (protocol co-chair), Jairam Lingappa (medical director), Amalia Magaret, James P. Hughes (protocol statisticians), Lawrence Corey, Jared M. Baeten, M. Juliana McElrath (co-investigators); Bakari Bakari, Linda S. Barnes, Justin Brantley, Jennifer Broad, Shauna Durbin, Paul Farley, Margaret Farrell-Ross, Carlos Flores, Harald Haugen, Renee Heffron, Ashley Jackson, Sasi Rek Jonnalagadda, Erin Kahle, Johanna Karas, Rebecca Karschney, Lara Kidoguchi, Khristina Kline, Meighan Krows, Matt Leidholm, Erin Lennon, Toni Maddox, Lynda McVarish, Allison Mobley, Susan Morrison, Nelly Mugo, Andrew Mujugira, Vikram Nayani, Patrick Ndase, Kim Nelson, Tracy Newbold, Dana Panteleeff, Dilrukshi Perera, Kara Richmond, Alice Rose, Kimberly Shaffer, Heena Shah, Shana Sniffen, Darcie Somera, Nancy Stoaks, Kathy Thomas, Calvin Tran, Richard Wang, Song Wang, Margaret Warner-Lubin, Ellen Wilcox, Christy Wilson, Angela McKay.

## **Study Sites:**

**Cape Town (Gugulethu), South Africa** (University of Cape Town): David Coetzee (principal investigator), Mercy Kamupira (coordinator); Alana de Kock, Sindiswa Godwana, Litha Gogo, Judith Huna, Khunjuzwa Khume, Zarina Lee, Susan Lindsey, Nombulelo Mabuto, Pamela Magona, Mpalali Makanyiseli, Ntombizonke Makhonza, Nozizwe Makola, Zukiswa Mazula, Thembisa Nkompela, Marcia Nkwateni, Mninawa Ntshongwana, Smruti Patel, Mshengu Tshabalala, Lennox Tshangela, Liso Tshingana

**Eldoret, Kenya** (Moi University, Indiana University): Kenneth Fife, Edwin Were, (principal investigators); Cosmas Apaka, Solomon Nzioka (study coordinators); Carole Achieng, Pamela Akhaabi, Paul Ayuo, Joyce Baliddawa, Francisca Barasa, Jairus Cheruiyot, Robert Cheruiyot, Mwimali Dorothy, Otieno Francis, Kutwa Godfrey, Ombim Jaleny, Eunice Kaguiru, Hellen Kamotho, Christine Kapere, Mwabe Kennedy, Alicen Komen, Joan Kosgei, Esmael Mbowo, Betty Melli, Francis Mudogo, Joseph Muga, Gatetua Mungai, Nereo Murgor, Gloria Muthui, Harun Njiru, Charles Odhiambo, Edith Ogallo, Wilfrida Ogolla, Dismas Oketch, Mowlem Pierre, Munga Roseirene, Joseph Rugut, Joseph Saruni, Jecinta Sawe, Sarah Seronei, John Sidle, Gilbert Simiyu, Margrate Thumbi, Moses Wafula, Emmanuel Wamalwa, Kara Wools-Kaloustian

**Gaborone, Botswana** (Botswana Harvard Partnership): Max Essex, Joseph Makhema (principal investigators); Patrick Ndase, Priti Dusara-Muzenda, Anchilla Owor (study coordinators); Clearance Abel,

Tuelo Bait seng, Naledi Betsi Bome, Cosmas Ekezie, Rupert Hambira, Thato Iketleng, Mmonnie Joseph, Kgakgamatso Keothepile, Masego Kgafela, Abram Kusane, Ria Madison, Maitseo Malamba, Early Manyiwa, Tlhalefo Maotwe, Ogomodise Masike, Onkemetse Mbazo, Georginah Modise, Glorious Modise, Wellington Mongwa, Uyapo Mooketsi, Robert Mooketsi, Boipelo Mosarwe, Sikhulile Moyo, Kiston Moyo, Fanuel Musarira, Rosemary Musonda, Thumbi Ndungu, Malebogo Ntshimane, Tiny Nyawe, Molly Pretorius Holme, Tshegofatsho Radinku, Kedibonye Rammidi, Tumulano Sekoto, Enoch Sepako, Fattimah Serojane, Ibou Thior, Erik Widenfelt

**Kampala, Uganda** (Infectious Disease Institute, Makerere University): Elly Katabira, Allan Ronald, (principal investigators); Linda Kavuma (study coordinator); Felix Bambia, Charles Brown, Nulu Bulya, Robert Byabasheija, Diego Izizinga, Moses L. Joloba, Betty Kajumba, Edith Kibuuka, Gladys Kibuuka, Robert Kikulwe, Ronald Kiranda, Samuel Kirimunda, Robert Kisekka, David Martin Kizza, Mark Kyagaba, Ronald Luzze, James Mutyaba Magala, Kenneth Mugwanya, Rosetta Musoke, Arch Paul Musingunzi, Joan Mutyoba, Julian Muwanguzi, Paul Muwanguzi, Justine Nabwire, Betty Najjta, Prossy Nakanwagi, Edith Nakku-Joloba, Agnes Nakyanzi, Dorothy Namagembe, Florence Nambi, Miriam Ryder Nampala, Richard Paul Ntege, Paul Odongo, Moses Okello, Emmanuel Okwero, Loyce Owor, Rebecca Sebikeje, Alice Ssebbaale, Zachary B. Tamale, Julius Wasubire

**Kigali, Rwanda** (Rwanda Zambia HIV Research Group, Emory University): Susan Allen, Kayitesi Kayitenkore, Etienne Karita (principal investigators); Brigitte Bekan, April Kelley (study coordinators); Barthelemy Bavana, Chantal Ingabire, Erixon Kabera, Placide Karangayire, Sabriya Linton, Emmanuel Mudidi, Jeannine Mukamuyango, Jacqueline Mukeshimana, Alexandrine Mushikiwabo, Jean-Luc Musoni, Alain-Placide Nsabimana, Alexis Nshimiyimana, Claire Nyirabagwiza, Julie Rufagari, Fidele Sebahungu

**Kisumu, Kenya** (Kenya Medical Research Institute, University of California San Francisco): Elizabeth Bukusi, Craig Cohen (principal investigators); Videlis Nduba, Josephine Odoyo (study coordinators); Jackson Achando, Maqline Adiambo Achola, Pauline Paciphique Adhiambo, Joy Adhiambo, Michael Adipo, Kawango Agot, Everlyne Akinyi, Anne Anyango Aluoch, Fidel Asol, Lucy Bonareri, Moses Bwoga, Elizabeth Dacha, Tabitha Dola, Marie Josephine, June Kasyoki, Mary Kibatha, Peter Kimani, Davy Koech, Jayne Kulzer, Violet Kwach, Timothy Kwena, Lyna Angila Memo, Irene Moraa, Charles Muga, Phylis Mwake, Phillip Mwangi, Samuel Ngugi

Ndichu, Loice Akeyo Ng'oma, Edmond Njeru, Leon Nyang'wara, Agnes Nyanjage, Alfred Obiero, Dancan Ochieng, Albert Ochieng, Bernard Ochuka, Edward Okoth Odera, Julius Odhacha, Celline Odipo, Joel Odondi, Linnet Odula, Samuel Ogembo, Jecinter Ogolo, Douglas Okello, Agnes Okello, Rita Okeyo, Moses Okombo, Loice Achieng' Okumu, Peron Olwenge, Fulgence Okombo Ombelu, Martin Omonge, Florence Ondiek, Joseph Onyang', Paul Onyango, Barrack Onyango, Hesbon Ooko, Consolata Opondo, James Orwa, Hanningtone Osese, Nellie Osir, Joshua Osoo, Anthony Otieno, Beatrice Adhiambo Otieno, Jacqueline Atieno Owiti, Jessica Raminya, Bernard Rono, Njali Sharma, Roseline Shiteka, Imeldah Nambengere Wakhungu, Njeri Wamae, Steve Wandiga

**Kitwe, Zambia** (Rwanda Zambia HIV Research Group, Emory University): Susan Allen, William Kanweka (principal investigators); Rachel Blacher (study coordinator); Amon Banda, Alysha Beyer, Norman Bwembya, Maureen M. Chanda, Mirriam Chanda, Hildah Chibwe, Marvis N. Chibwe, Hannah Cluck, Lovemore Kaetano, Maria Kafwaka, Blessings K. Kapatiso, Webster Kasonga, Innocent Kolala, Barrot Lambdin, Josssen Masedza, Petronella Mukuka, Lazarous Mulongoti, Charles Munene, Gladys M. Musonda, Mwaka Mutiti, Dorothy Mutwale, Chrispin Namafente, Jacob Ndhlovu, Irene M. Nyoni, Besse Phiri, Mercy Sakala, Heena Shah, Purity Silumesi, Laura Veal

**Lusaka, Zambia** (Rwanda Zambia HIV Research Group, Emory University): Susan Allen, Bellington Vwalika (principal investigators), Rachel Blacher, Faith Henderson (study coordinators); Roy Aikayo, Florence Aikayo, Stable Besa, Aaron Chitambi, Rhoidah Chitambi, Mable Katongo, Michelle Keeling, Christine Matoba, Muyunda Mulenga, Bryan Musonda, Shebba Musonda, Lloyd Musulwe, Susan Mweemba, Custom Mwila, Diniwe Ndhlovu, Mweene Shansonga, Tyronza Sharkey, Hilda Shumba

**Moshi, Tanzania** (Kilimanjaro Christian Medical College, Harvard University, London School of Hygiene and Tropical Medicine): Saidi Kapiga, Rachel Manongi (principal investigators), Paul Magao, Alemush Imeru, Msafiri Swai (study coordinators); Charles Assenga, Basidi Bamba, Anna David Gonzales, Michael John Mbwambo, Goodluck Kessy, Maryam Kidella, Sophia Mafole Tillya, Honoratha Makyao, Emilian Maliwa, Exaud Mallya, Beatrice Mandao, Venance Maro, Freedom Maro, Martha Masaki, Elizabeth Mbuya, Herieth Michael Bengesi, Amina Mlay, Simon Mosha, Matilda Mrawa, Hedwiga Mrema, Godrule Mrema, Jacinta Msabaa, Anna

Msuya, Gilleard Mushi, David Ngilangwa, Isaya Olotu, Magdalena Otaru, Veronica Riwa, Thasiana Samba, Shemhilu Samwel Tamilwai, Lucky Temu

**Nairobi, Kenya** (University of Nairobi, University of Washington): Carey Farquhar, Grace John-Stewart, James Kiarie (principal investigators); Harrison Tamooch, Stephen Gichuhi, John Kinuthia, Susan Morrison (study coordinators); Hussein Abkallo, Caroline Akinyi, Shweta Brahmhatt, Edith Gitonga, Sharon Idala, John Kamau, Rose Kamoni, Joseph Karanja, Mugure Kebaara, Sally Keino, Florence Keli-Kariithi, Mary Kibatha, Fredah Kinoti, MaryStella Kinyua, Victor Ludenyo, Shiphrah Maina, Emily Nelima Makhoha, Jerusha Malubi, Fred Mose, David Mugo, Lucy Mukundi, Lucy Mulinge, Bernard Makau Mulwa, Joseph Mureithi, Lillian Mutie, Winnie Mutiso, Caroline Ndungu, Mary Ngugi, Fredrick Nindo, Stella Njoroge, Esther Njuguna, William Oloo Obara, Clifford Obuya, Judy Ogallo, Naome A. Okoth, Ruth Onyanyo, Naphtali Opiyo, Janet Otachi, Erick Oweya, Fatuma Swaleh, Alexander Thiongo, Michele Timko, Margaret Wachira, Andrew Wafula, Martha Wairimu, Catherine Wamuyu, Moses Waweru, Jonathan Yegon

**Ndola, Zambia** (Rwanda Zambia HIV Research Group, Emory University): Susan Allen, Mubiana Inambao (principal investigators), Frank Wong (study coordinator); Josephine Banda Bhebhe, Muntinta Chilimboyi K, Jonathan Chinyama, Lindiwe Chinyama, Fredrick Chisankuta, Peter Chileshe, Garret Cox, Joseph Daka, Yvonne Gilbert, Ireen Kabwe, Esther Kyakilika, Sabriya Linton, Paricia Malauni-Nkhoma, Charles Maleya, Chiti H.S. Masase, Sitiwe C. Mulaisho, Watson Mulumbwa, Tobias Mushili, Mangaji Mwale, Malila Shacholi, Fredah Simbala

**Orange Farm (Johannesburg), South Africa** (Reproductive Health & HIV Research Unit, University of the Witwatersrand): Sinead Delany-Moretlwe, Helen Rees (principal investigators), Nonkululeko Mlaba; Mamazane Maduna (study coordinators); Yaw Adu-Sarkodie, Godspower Akpomiemie, Jessica Arjun, Gusta Francisco, Nkgolo Gegana, Susan Govuzela, Dorcas Mabasa, Mavis Madi, Vuyiswa Makambi, Zodwa Makau, Maggie Manaka, Portia Manamela, Pholiswa Maseko, Thililelwi Mashapa, Mlungisi Maswanganyi, Kenneth Mdaka, Claire von Mollendorf, Jocelyn Moyes, Kennedy Ngobeni, Adam Readhead, Kennedy Ngobeni, Nthabiseng Suping, Zama Shongwe, Mandisa Tsholwana

**Soweto (Johannesburg), South Africa** (Perinatal HIV Research Unit, University of the Witwatersrand): Guy de Bruyn, Glenda Gray, James McIntyre (principal investigators); Puleng Dhlamini, Ntomboxolo Bandezi,

Sibongile Dladla Hedwig Kowo, Gavin Robertson (study coordinators); Reshma Chhiboo, Zanele Jele, Luleko Lumko, Chris Madima, Nikiwe Majola, Moipone Mathole, Mosidi Matshe, Zanele Maphiri, Nelly Masilo, Robert Modiadie, Pinky Montso, Dillon Moodley, Mpho Motlamelle, Thina Mphafudi, Nompumelelo Mphaka, Lindiwe Nobangela, Thabo Seabelo, Nnaka Sibeko, Gugulethu Tshabalala, Ntombi Vilakazi

**Thika, Kenya** (University of Nairobi, University of Washington): Nelly Rwamba Mugo (principal investigator); Kenneth Ngure (study coordinator); Nicholas Boro, Henry Chege, Sarah Iguna, Elizabeth Irungu, Alice Kinyoki, Simon Mburu, Peter Michira, Paul Musingila, Margaret Mutungi, Peterson Mwaniki, John Mwathi, Victor Nyaga, Jacinta Nyokabi, George Ochogo, Snaidah Ongachi, Ann Wangari, Rose Wanjala

**Contract Lab Services** (University of the Witwatersrand, Johannesburg, South Africa): Wendy Stevens, Ute Jentsch, Charlotte Ingram, Jan van den Heuvel, Mumtaz Booley, Feroza Bulbulia

**DF/Net Research, Inc.** (Seattle, USA): Lisa Ondrejcek, Darryl Pahl, Brian Postle, Richard Berman, Tami Ahn, Brittini Callies, David Coblenz, Barry Curtis, Curtis Olsen, Gavin Radkey, Jenny Schulte, Heena Shah, Theresa Shea

**Mullins Laboratory** (University of Washington, Seattle, USA): James I. Mullins, Mary S. Campbell, Wenjie Deng, Dana Raugi, Stefanie Sorensen, Jill Stoddard, Kim Wong, Hong Zhao

**University of Washington Research Laboratory on Sexually Transmitted Infections** (Seattle, USA): William Whittington, Ana Maria Xet-Mull

**University of Washington Retrovirology Laboratory** (Seattle, USA): Robert W. Coombs, Joan Dragavon, Glenda Daza, Jose Pax Ortega, Michael Corey Scherrer

**University of Washington Virology Laboratory** (Seattle, USA): Lawrence Corey, Rhoda A. Morrow, Jayne Kuypers, Anne Cent, Kurt Diem, Meei-Li Huang, Patricia Nguyen, Greg Pepper, Reigran Sampoleo, Tracy Santo Hayes, Stacy Selke, Carol Zimmerman

## References

1. Golden MR, Ashley-Morrow R, Swenson P, Hogrefe WR, Handsfield HH, Wald A. Herpes simplex virus type 2 (HSV-2) Western blot confirmatory testing among men testing positive for HSV-2 using the focus enzyme-linked immunosorbent assay in a sexually transmitted disease clinic. *Sex Transm Dis* 2005;32:771-7.
2. Laeyendecker O, Henson C, Gray RH, et al. Performance of a commercial, type-specific enzyme-linked immunosorbent assay for detection of herpes simplex virus type 2-specific antibodies in Ugandans. *J Clin Microbiol* 2004;42:1794-6.
3. Gamiel JL, Tobian AA, Laeyendecker OB, et al. Improved performance of enzyme-linked immunosorbent assays and the effect of human immunodeficiency virus coinfection on the serologic detection of herpes simplex virus type 2 in Rakai, Uganda. *Clin Vaccine Immunol* 2008;15:888-90.
4. Ashley RL, Militoni J, Lee F, Nahmias A, Corey L. Comparison of Western blot (immunoblot) and glycoprotein G-specific immunodot enzyme assay for detecting antibodies to herpes simplex virus types 1 and 2 in human sera. *J Clin Microbiol* 1988;26:662-7.
5. Lingappa J, Kahle E, Mugo N, et al. Characteristics of HIV-1 Discordant Couples Enrolled in a Trial of HSV-2 Suppression to Reduce HIV-1 Transmission: The Partners Study. *PLoS ONE* 2009;4:e5272.
6. Jerome K, Huang M, Wald A, Selke S, Corey L. Quantitative stability of DNA after extended storage of clinical specimens as determined by real-time PCR. *J Clin Microbiol* 2002;40:2609-11.
7. Wald A, Huang ML, Carrell D, Selke S, Corey L. Polymerase chain reaction for detection of herpes simplex virus (HSV) DNA on mucosal surfaces: comparison with HSV isolation in cell culture. *J Infect Dis* 2003;188:1345-51.
8. HIV Sequence Compendium. In: Leitner T, Foley B, Hahn BH, et al., eds. Alamos National Laboratory, NM: Theoretical Biology and Biophysics Group; 2005:LA-UR 06-0680.
